# Supplementary material for: Microstructure, electrocatalytic and sensing properties of nanoporous Pt46Ni54 alloy nanowires fabricated by mild dealloying
Source: Royal Society of Chemistry journal article supplement (doi:10.1039/c0jm00113a), 2010-01-01
Supplement: c0jm00113a.pdf [file c0jm00113a.pdf]

Supplementary Information for

**Microstructure, electrocatalytic and sensing properties of nanoporous Pt<sub>46</sub>Ni<sub>54</sub> alloy nanowires fabricated by mild dealloying**

**Lifeng Liu,\* Roland Scholz, Eckhard Pippel and Ulrich Gösele†**

*Max Planck Institute of Microstructure Physics, Weinberg 2, D 06120 Halle, Germany*

\* E-mail: [liulif@mpi-halle.de](mailto:liulif@mpi-halle.de)

† In memory of Prof. Ulrich Gösele

**Calculation of the Pt loading on nanoporous Pt<sub>46</sub>Ni<sub>54</sub> nanowire electrode**

The Pt loading for nanoporous Pt<sub>46</sub>Ni<sub>54</sub> nanowire electrode can be estimated from the Pt content of the electrodeposited Pt<sub>4</sub>Ni<sub>96</sub> nanowires, assuming reasonably there was no Pt loss during the dealloying treatment. The Pt loading can be expressed:

$$\begin{aligned} M_{\text{Pt}} &= \rho \times S_{\text{cell}} \times D_{\text{pore}} \times F \times V_{\text{NW}} \times W \\ &= \rho \times S_{\text{cell}} \times D_{\text{pore}} \times F \times \pi (R_{\text{NW}})^2 \times L_{\text{NW}} \times W \end{aligned} \quad (\text{S1})$$

where  $\rho = 8.9 \text{ g cm}^{-3}$  is the density of nickel (assuming that the density of Pt<sub>4</sub>Ni<sub>96</sub> alloy is approximately equal to that of nickel);  $S_{\text{cell}}$  represents the exposed area of the electrochemical cell;  $D_{\text{pore}}$  stands for the pore density of the AAO membranes ( $1 \times 10^{10} \text{ cm}^{-2}$  for H<sub>2</sub>C<sub>2</sub>O<sub>4</sub>-anodized AAOs);  $F$  represents the degree of filling of the electrodeposited nanowires (typically 80~95 %);  $V_{\text{NW}}$  is the volume of a single electrodeposited Pt<sub>4</sub>Ni<sub>96</sub> nanowire;  $R_{\text{NW}}$  and  $L_{\text{NW}}$  represent the radius and length of Pt<sub>4</sub>Ni<sub>96</sub> nanowires ( $R_{\text{NW}} = 22.5 \text{ nm}$  according to TEM observation and  $L_{\text{NW}} \approx 2.1 \text{ }\mu\text{m}$  for 5 min electrodeposition at -1.0V vs. Ag/AgCl according to SEM examination, Figure S1);  $W$  stands for the weight percentage of Pt in Pt<sub>4</sub>Ni<sub>96</sub> alloy (~12 %). Taking  $S_{\text{cell}} = 0.95 \text{ cm}^2$ ,  $D_{\text{pore}} = 1 \times 10^{10} \text{ cm}^{-2}$ ,  $F = 0.9$ ,  $R_{\text{NW}} = 22.5 \text{ nm}$ ,  $L_{\text{NW}} = 2.1 \text{ }\mu\text{m}$  and  $W = 12 \%$  into the equation S1, the Pt loading is calculated as:

$$M_{\text{Pt}} = 8.9 \text{ gcm}^{-3} \times 0.95 \text{ cm}^2 \times 1 \times 10^{10} \text{ cm}^{-2} \times 0.9 \times \pi \times (22.5 \text{ nm})^2 \times 2.1 \text{ }\mu\text{m} \times 12 \% \\ = 30.5 \text{ }\mu\text{g}$$

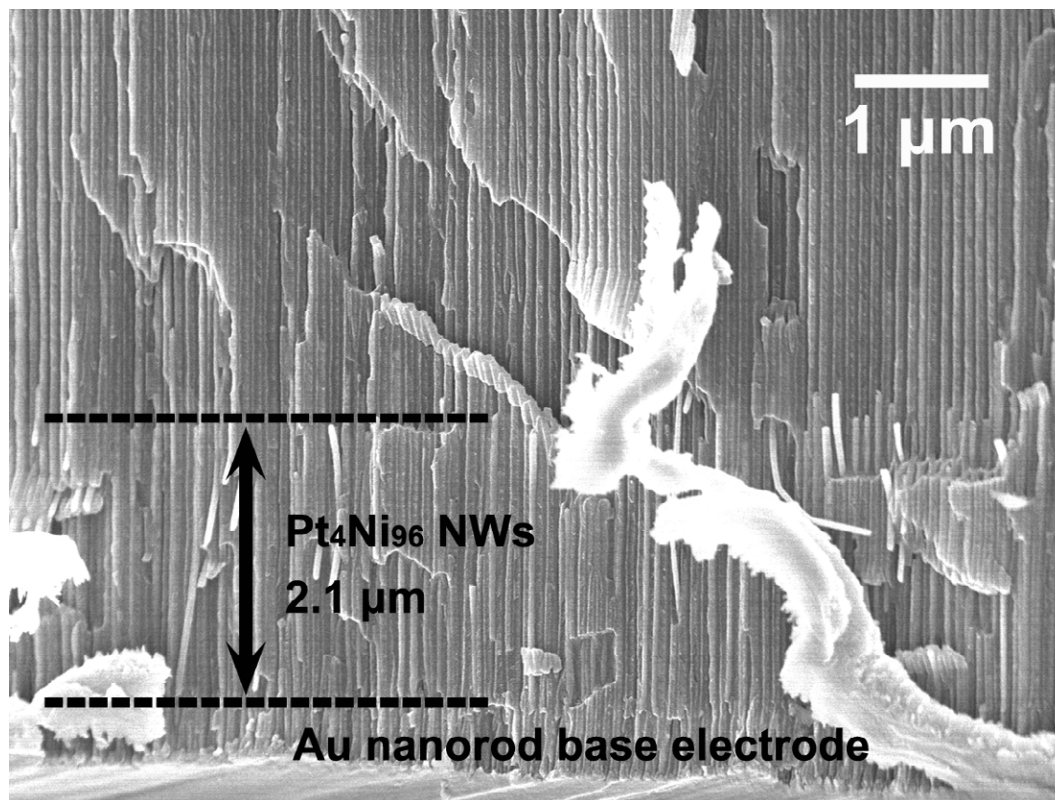

**Figure S1.** A cross-sectional SEM image of the electrodeposited  $\text{Pt}_4\text{Ni}_{96}$  nanowires embedded in the AAO membrane, which were used to determine the length of  $\text{Pt}_4\text{Ni}_{96}$  nanowires for estimating the Pt loading. The electrodeposition was performed at  $-1.0\text{V}$  (vs.  $\text{Ag}/\text{AgCl}$ ) for 5 min at room temperature.
